# Supplementary material
Source: publisher site journal article supplement (https://www.dovepress.com/get_supplementary_file.php?f=496339.docx)
Supplement: Supplementary file 1 [file get_supplementary_file.php]

# Measurements items

**Mindfulness (Brown and Ryan, 2003)**

1.I could be experiencing some emotion and not be conscious of it until some time later. (Reverse coded)

2. I break or spill things because of carelessness, not paying attention, or thinking of something else. (Reverse coded)

3. I find it difficult to stay focused on what’s happening in the present. (Reverse coded)

4. I tend to walk quickly to get where I’m going without paying attention to what I experience along the way. (Reverse coded)

5. I tend not to notice feelings of physical tension or discomfort until they really grab my attention. (Reverse coded)

6. I forget a person’s name almost as soon as I’ve been told it for the first time. (Reverse coded)

7. It seems I am “running on automatic” without much awareness of what I’m doing. (Reverse coded)

8. I rush through activities without being really attentive to them. (Reverse coded)

9. I get so focused on the goal I want to achieve that I lose touch with what I am doing right now to get there. (Reverse coded)

10. I do jobs or tasks automatically, without being aware of what I’m doing. (Reverse coded)

11. I find myself listening to someone with one ear, doing something else at the same time. (Reverse coded)

12. I drive places on “automatic pilot” and then wonder why I went there. (Reverse coded)

13. I find myself preoccupied with the future or the past. (Reverse coded)

14. I find myself doing things without paying attention. (Reverse coded)

15. I snack without being aware that I’m eating. (Reverse coded)

**Panic buying (Singh et al., 2021)**

1.I intend to buy more items than I need during the COVID-19 crisis.

2.I predict that I would buy more items than I need during the COVID-19 crisis.

3.I plan to buy more items than I need during the COVID-19 crisis.

4.I will always try to buy more items than I need during the COVID-19 crisis.

5.I will recommend to others to buy more items than they need during the COVID-19 crisis.

**Social alienation (Yang et al., 2002)**

1. I often feel a sense of powerlessness.

2. My ideals and desires are inconsistent with reality.

3. I often feel compelled to do things I don’t want to do.

4. The world is changing so fast that I often struggle to decide which principles to follow.

5. When I encounter troubles, I cannot rely on the collective or organizations for moral support and help.

6. Relatively speaking, my life is monotonous and dull.

7. I have a sense of self-disgust and aversion toward myself.

8. I like myself. (Reverse coded)

9. I hold a positive attitude towards myself. (Reverse coded)

10. I feel that I am a good person. (Reverse coded)

11. Overall, I am satisfied with myself. (Reverse coded)

12. I feel a sense of distance from myself.

13. The world is ever-changing, and I cannot grasp it.

14. I often feel that I cannot control many things.

15. I always feel like a failure.

16. There are so many ideologies nowadays that I cannot determine which one to believe in.

17. I feel powerless about many things.

18. I feel like my life lacks direction.

19. The daily stresses of life make me feel depressed.

20. I feel like something is restricting my freedom.

21. I have a sense of being pressured by something.

22. I feel that my life lacks fulfillment.

23. I often experience a sense of tension and oppression.

24. I feel a lot of pressure on my mind.

**Death anxiety (Templer, 1970)**

1. I am very much afraid to die.

2. The thought of death seldom enters my mind. (Reverse coded)

3. It doesn’t make me nervous when people talk about death. (Reverse coded)

4. I dread to think about having to have an operation.

5. I am not at all afraid to die. (Reverse coded)

6. I am not particularly afraid of getting cancer. (Reverse coded)

7. The thought of death never bothers me. (Reverse coded)

8. I am often distressed by the way time flies so very rapidly.

9. I fear dying a painful death.

10. The subject of life after death troubles me greatly.

11. I am really scared of having a heart attack.

12. I often think about how short life really is.

13. I shudder when I hear people talking about the end of the world.

14. The sight of a dead body is horrifying to me.

15. I feel that the future holds nothing for me to fear. (Reverse coded)
